# Supplementary material
Source: PubMed Central journal article supplement (PMC3496203)
Supplement: supp_1102965_11-02965_S1-2.pdf [file supp_1102965_11-02965_S1-2.pdf]

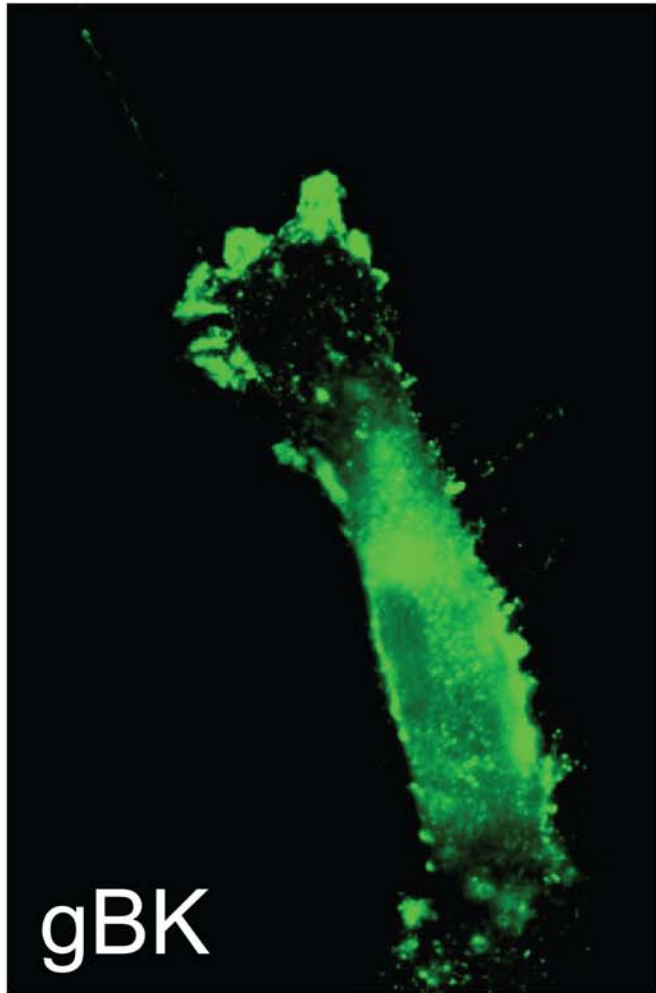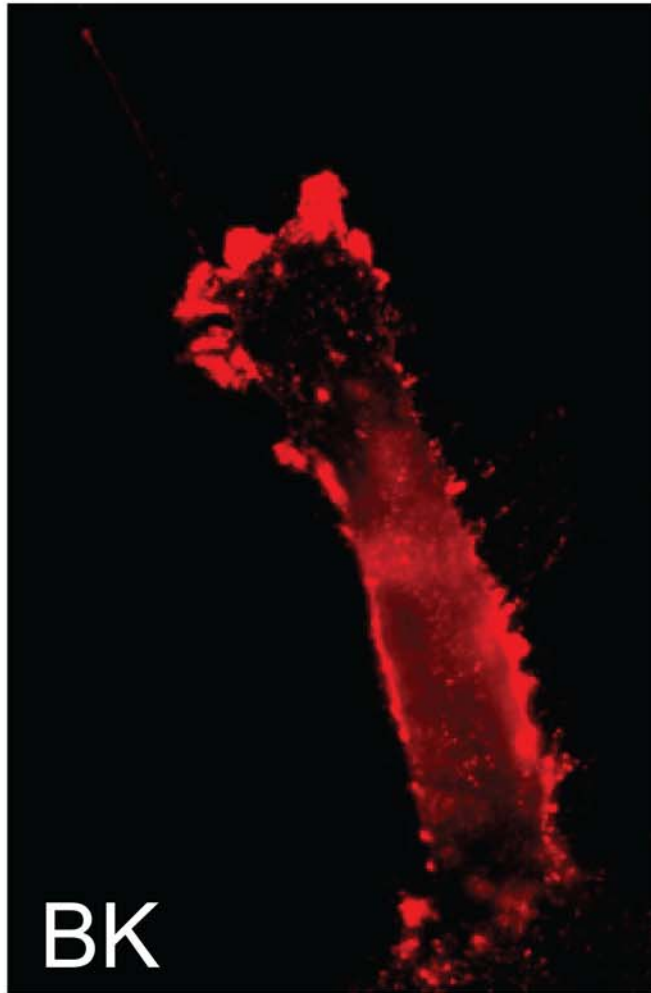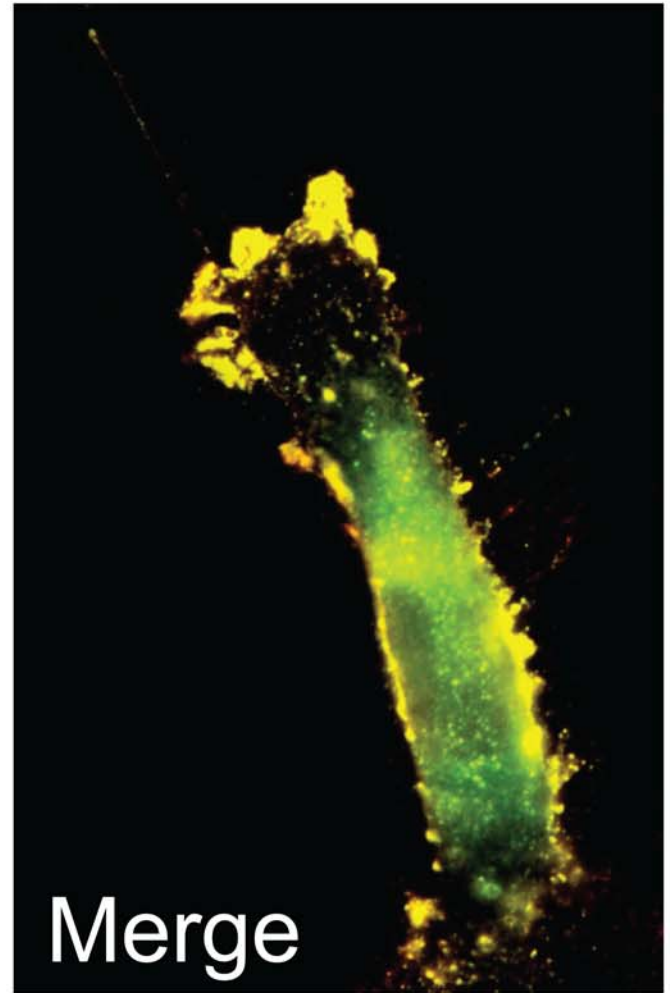

**Supplemental Figure 1**

Supplemental Figure 1. Co-staining of BK and gBK within U251 cells. U251 cells were cultured as adherent cells overnight onto cover slips. The cells were first stained with the rabbit BK channel antibody since its epitope was on the extracellular region. The cells were then fixed and permeabilized and then stained with the goat gBK antibody, which stains the intracellular region of the gBK channel. The secondary anti-rabbit antibody (Texas-Red/Deep Red labeled, Middle Panel), and anti-goat antibody (FITC labeled, Left Panel) and the merged figure (Right Panel). All micrographs were taken with a 100X lens.

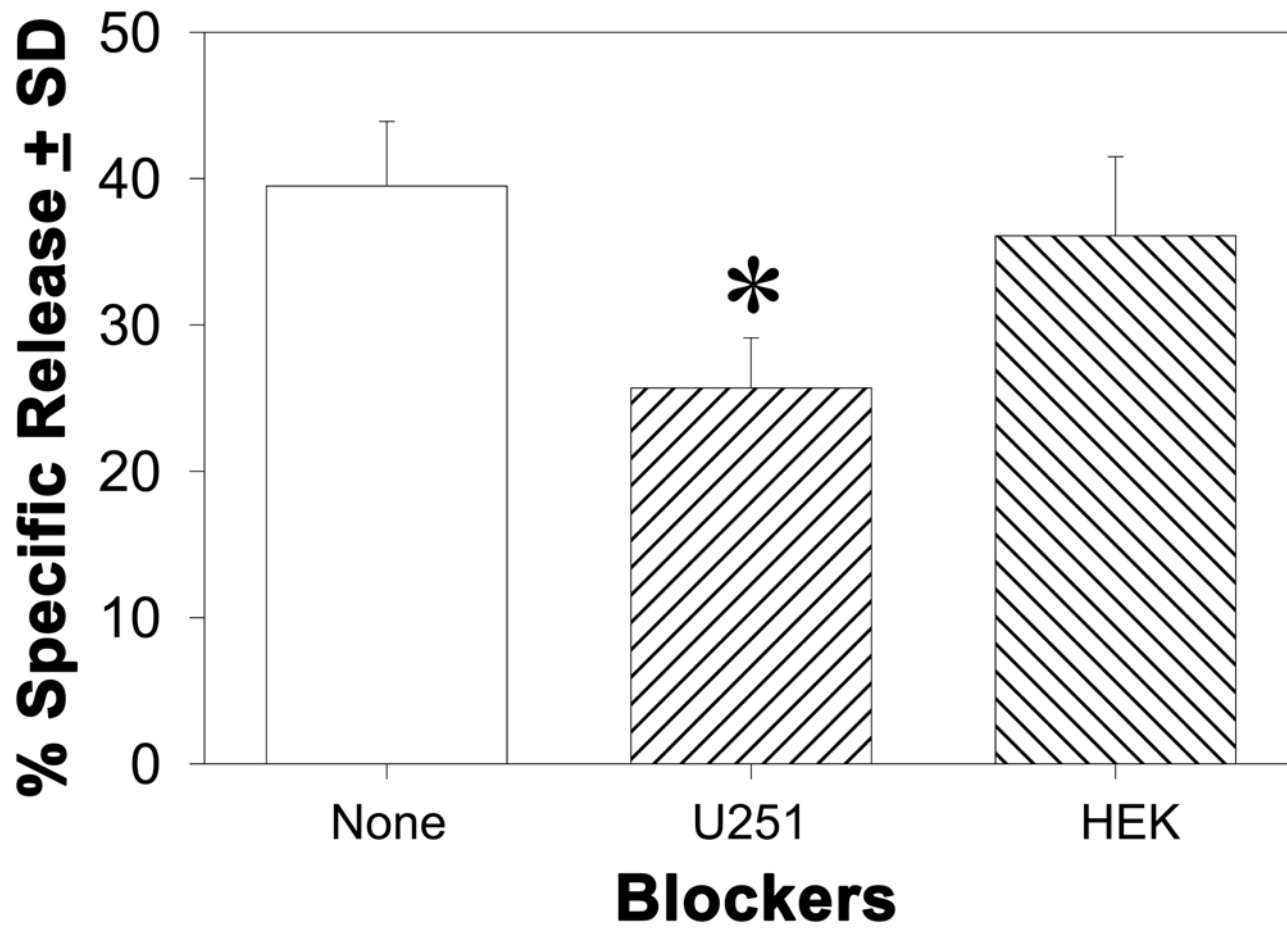

**Supplemental Figure 2**

Supplemental Figure 2. Cold-target inhibition cytotoxicity experiment with gBK2 CTLs. gBK2-specific pCTL-1 effectors were used in this 6 hr assay at a 6:1 effector target ratio. <sup>51</sup>Cr labeled U251 cells were used as the target cells. Before the pCTL-1 were added to the radio-labeled U251 cells, either non-radiolabeled U251 or HEK cells were added at a 1:1 ratio with the radiolabeled U251 cells. Significant inhibition from the control, non-blocked is designated by the asterisk.
